# Supplementary material for: Epidemiological analysis of syphilis trends, disparities, and public health implications in the United States, 2018–2022
Source: BMC Infect Dis. 2025 Sep 12;25:1106. doi: 10.1186/s12879-025-11332-4 (PMC12427103; doi:10.1186/s12879-025-11332-4)
Supplement: Supplementary file 1 — Supplementary Material 1. [file 12879_2025_11332_MOESM1_ESM.xlsx]

## Sheet: Figure 1
Disease	Cases					Percent Change
	2018	2019	2020	2021	2022	5 Year	1 Year
Chlamydia	1758668	1808703	1579885	1644416	1649716	-6.19514	0.322303
Gonorrhea	583405	616392	677769	710151	648056	11.0817	-8.74392
Syphilis (All Stages)	113739	127943	131797	173858	203500	78.9184	17.0495
Total Reported STIs	2457137	2554920	2391613	2531300	2505027	1.94902	-1.03793

## Sheet: Supplementary Figure 1
STI	Year	Rate
Primary & Secondary Syphilis	2018	10.7
Primary & Secondary Syphilis	2019	11.9
Primary & Secondary Syphilis	2020	12.6
Primary & Secondary Syphilis	2021	16.2
Primary & Secondary Syphilis	2022	17.7

## Sheet: Figure 2
STI	Year	State Name	State USPS	State FIPS	Rate
Primary and secondary syphilis	2022	South Dakota	SD	46	84.3
Primary and secondary syphilis	2022	District of Columbia	DC	11	40.3
Primary and secondary syphilis	2022	New Mexico	NM	35	36
Primary and secondary syphilis	2022	Arkansas	AR	5	32.9
Primary and secondary syphilis	2022	Oklahoma	OK	40	31.8
Primary and secondary syphilis	2022	Mississippi	MS	28	31.1
Primary and secondary syphilis	2022	Arizona	AZ	4	29.2
Primary and secondary syphilis	2022	Montana	MT	30	28.9
Primary and secondary syphilis	2022	Nevada	NV	32	28.4
Primary and secondary syphilis	2022	Louisiana	LA	22	26.7
Primary and secondary syphilis	2022	Oregon	OR	41	26.3
Primary and secondary syphilis	2022	Washington	WA	53	24.7
Primary and secondary syphilis	2022	Alabama	AL	1	23.5
Primary and secondary syphilis	2022	Missouri	MO	29	23.5
Primary and secondary syphilis	2022	Delaware	DE	10	23.4
Primary and secondary syphilis	2022	North Carolina	NC	37	23.1
Primary and secondary syphilis	2022	Alaska	AK	2	21.8
Primary and secondary syphilis	2022	Florida	FL	12	20.8
Primary and secondary syphilis	2022	Ohio	OH	39	20.4
Primary and secondary syphilis	2022	California	CA	6	20.1
Primary and secondary syphilis	2022	Georgia	GA	13	20
Primary and secondary syphilis	2022	South Carolina	SC	45	19.6
Primary and secondary syphilis	2022	New York	NY	36	18.3
Primary and secondary syphilis	2022	Hawaii	HI	15	16
Primary and secondary syphilis	2022	Tennessee	TN	47	16
Primary and secondary syphilis	2022	Colorado	CO	8	15.7
Primary and secondary syphilis	2022	Texas	TX	48	15.5
Primary and secondary syphilis	2022	Kentucky	KY	21	14.8
Primary and secondary syphilis	2022	Maryland	MD	24	12.7
Primary and secondary syphilis	2022	Wisconsin	WI	55	12.6
Primary and secondary syphilis	2022	West Virginia	WV	54	12.3
Primary and secondary syphilis	2022	Rhode Island	RI	44	12.2
Primary and secondary syphilis	2022	Kansas	KS	20	11.8
Primary and secondary syphilis	2022	Massachusetts	MA	25	11.8
Primary and secondary syphilis	2022	Minnesota	MN	27	11.8
Primary and secondary syphilis	2022	Puerto Rico	PR	72	11.8
Primary and secondary syphilis	2022	Illinois	IL	17	11.6
Primary and secondary syphilis	2022	New Jersey	NJ	34	11
Primary and secondary syphilis	2022	Nebraska	NE	31	10.9
Primary and secondary syphilis	2022	Pennsylvania	PA	42	10.8
Primary and secondary syphilis	2022	Virginia	VA	51	10.8
Primary and secondary syphilis	2022	Iowa	IA	19	10.4
Primary and secondary syphilis	2022	Indiana	IN	18	10
Primary and secondary syphilis	2022	Michigan	MI	26	9.7
Primary and secondary syphilis	2022	North Dakota	ND	38	8.2
Primary and secondary syphilis	2022	Utah	UT	49	7
Primary and secondary syphilis	2022	Connecticut	CT	9	6.8
Primary and secondary syphilis	2022	Idaho	ID	16	6.1
Primary and secondary syphilis	2022	Maine	ME	23	5.9
Primary and secondary syphilis	2022	US Virgin Islands	VI	78	5.7
Primary and secondary syphilis	2022	New Hampshire	NH	33	5.3
Primary and secondary syphilis	2022	Wyoming	WY	56	3.6
Primary and secondary syphilis	2022	Guam	GU	66	1.2
Primary and secondary syphilis	2022	Vermont	VT	50	0.5
Primary and secondary syphilis	2022	American Samoa	AS	60	0
Primary and secondary syphilis	2022	Northern Mariana Islands	MP	69	0

## Sheet: Figure 3A
STD	Year	Sex and Sex of Sex Partners	Cases
Primary and secondary syphilis	2018	Men	30034
Primary and secondary syphilis	2018	Women	4995
Primary and secondary syphilis	2019	Men	32402
Primary and secondary syphilis	2019	Women	6493
Primary and secondary syphilis	2020	Men	33646
Primary and secondary syphilis	2020	Women	7901
Primary and secondary syphilis	2021	Men	41349
Primary and secondary syphilis	2021	Women	12265
Primary and secondary syphilis	2022	Men	44309
Primary and secondary syphilis	2022	Women	14652

## Sheet: Figure 3B
	2018	2019	2020	2021	2022	Average	Standard Deviation
15–19	10.9	11.2	10.6	12	12.4	11.42	0.756307
20–24	45.2	45.8	44	51.2	50.1	47.26	3.18559
25–29	55.1	57.7	60	68.1	67.8	61.74	5.929
30–34	45.4	50.4	54.7	67.7	70.5	57.74	10.9249
35–44	28.7	32.1	33.7	44.4	48.7	37.52	8.5745

## Sheet: Figure 3C
	2018	2019	2020	2021	2022	Average	Standard Deviation
15–19	4.3	4.9	5.8	7.5	8.5	6.2	1.76352
20–24	10.1	11.7	14.4	19.5	21.7	15.48	4.98116
25–29	9.3	11.8	14.6	22.3	24.1	16.42	6.49823
30–44	7.5	9.8	12.8	18.9	24.1	14.62	6.8086
35–39	4.7	6.8	8	14.5	17.9	10.38	5.57378

## Sheet: Figure 4
Attributes	2018	2019	2020	2021	2022	Average	Standard Deviation
AI/AN	15.4	21.1	26.8	46.7	67	35.4	21.2409
Asian	4.5	4.6	4.5	4.8	4.9	4.66	0.181659
Black/AA	27.9	30.8	33.6	41.9	44.4	35.72	7.13071
Hispanic/Latino	12.8	13.6	13.6	17.2	18.6	15.16	2.5706
Multiracial	9.1	10.4	13.3	19.4	25	15.44	6.6568
NH/PI	16	22.7	22	33.9	30.2	24.96	7.0981
White	6	6.6	6.9	9.1	10.2	7.76	1.79805

## Sheet: Figure 5
	2018	2019	2020	2021	2022
Exchanging sex for drugs or money	1276	1576	1331	1683	1937
Sex while intoxicated and/or high on drugs	7526	8831	8443	11106	12417
Sex with a person who injects drugs	1419	1872	1570	2178	2862
Sex with an anonymous partner	11312	13357	12423	14793	15870

## Sheet: Figure 6
	2018	2019	2020	2021	2022
Cocaine use	978	1084	914	1168	1377
Crack use	365	411	355	459	540
Heroin use	569	661	622	763	798
Injection drug use	1205	1681	1489	2186	2543
Methamphetamine use	2498	3031	2649	3874	4263

## Sheet: Figure 7
	2018	2019	2020	2021	2022	Average	Standard Deviation
Men who have sex with men (MSM)	18760	18381	17968	19229	20004	18868.4	787.345
Men who have sex with women only (MSW)	5416	7289	7801	11228	13359	9018.6	3208.32
Men with unknown sex of sex partners (MSU)	5858	6732	7877	10892	10946	8461	2355.37
Missing or unknown sex	32	96	107	143	54	86.4	43.9579
Women	4995	6493	7901	12265	14652	9261.2	4055.77
